# Supplementary material
Source: publisher figshare collection journal article supplement (https://frontiersin.figshare.com/ndownloader/files/12469571)
Supplement: Supplementary file [file 12469571]

**Supplemental Table 8:** Genes originating from lateral gene transfer in Rokubacteria Amazon FNV 2010 15\_13 as identified by CompareM. The complete output is available upon request.

| Gene Id                     | Length (bp) | Annotation of deviants                                   | Deviations from mean |
|-----------------------------|-------------|----------------------------------------------------------|----------------------|
| fig 6666666.168244.peg.3060 | 4971        | General secretion pathway protein N                      | 2.85                 |
| fig 6666666.168244.peg.884  | 1536        | Basic proline rich protein precursor                     | 5.42                 |
| fig 6666666.168244.peg.3138 | 2232        | Hypothetical protein                                     | 3.70                 |
| fig 6666666.168244.peg.1411 | 1866        | Basic proline rich protein precursor                     | 3.56                 |
| fig 6666666.168244.peg.266  | 147         | Dipeptide transport system permease DppC                 | 0.76                 |
| fig 6666666.168244.peg.3100 | 1290        | Basic proline rich protein precursor                     | 5.16                 |
| fig 6666666.168244.peg.1595 | 1305        | Hypothetical protein                                     | 1.69                 |
| fig 6666666.168244.peg.1306 | 2901        | PE-PGRS                                                  | 1.64                 |
| fig 6666666.168244.peg.1991 | 1395        | Hypothetical protein                                     | 2.18                 |
| fig 6666666.168244.peg.1367 | 153         | Hypothetical protein                                     | 1.23                 |
| fig 6666666.168244.peg.2626 | 1383        | Hypothetical protein                                     | 2.79                 |
| fig 6666666.168244.peg.2780 | 2865        | Putative autotransporter                                 | 1.42                 |
| fig 6666666.168244.peg.769  | 1056        | Hypothetical protein                                     | 3.57                 |
| fig 6666666.168244.peg.2126 | 645         | Hypothetical protein                                     | 3.23                 |
| fig 6666666.168244.peg.3182 | 2739        | Regulatory protein LuxR                                  | 0.18                 |
| fig 6666666.168244.peg.2499 | 126         | Hypothetical protein                                     | 2.06                 |
| fig 6666666.168244.peg.2217 | 1998        | Beta-hexosaminidase                                      | 0.82                 |
| fig 6666666.168244.peg.1616 | 5028        | Conserved repeat domain                                  | 1.14                 |
| fig 6666666.168244.peg.801  | 123         | Hypothetical protein                                     | 3.12                 |
| fig 6666666.168244.peg.744  | 327         | LSU L24p                                                 | 1.50                 |
| fig 6666666.168244.peg.2054 | 636         | Basic proline rich protein precursor                     | 3.89                 |
| fig 6666666.168244.peg.34   | 171         | Hypothetical protein                                     | 2.79                 |
| fig 6666666.168244.peg.2705 | 750         | Hypothetical protein                                     | 3.15                 |
| fig 6666666.168244.peg.2912 | 1416        | Probable poly(beta-D-mannuronate) O-acetylase            | 0.36                 |
| fig 6666666.168244.peg.1280 | 1788        | Choline dehydrogenase                                    | 1.52                 |
| fig 6666666.168244.peg.2305 | 1452        | Hypothetical protein                                     | 2.38                 |
| fig 6666666.168244.peg.939  | 123         | N-methylhydantoinase A                                   | 2.59                 |
| fig 6666666.168244.peg.2840 | 3111        | RND multidrug efflux transporter; acriflavine resistance | -0.04                |

|                             |      |                                                    |       |
|-----------------------------|------|----------------------------------------------------|-------|
| fig 6666666.168244.peg.667  | 927  | Collagen triple helix repeat domain                | 0.57  |
| fig 6666666.168244.peg.1446 | 114  | Hypothetical protein                               | 2.89  |
| fig 6666666.168244.peg.1222 | 171  | Hypothetical protein                               | 1.89  |
| fig 6666666.168244.peg.1548 | 2139 | Hypothetical protein                               | 1.33  |
| fig 6666666.168244.peg.2979 | 1098 | TolA precursor                                     | 1.28  |
| fig 6666666.168244.peg.2221 | 630  | Hypothetical protein                               | 1.89  |
| fig 6666666.168244.peg.2586 | 960  | Enoyl-[acyl-carrier-protein] reductase [FMN]       | 1.23  |
| fig 6666666.168244.peg.2232 | 201  | Hypothetical protein                               | 2.85  |
| fig 6666666.168244.peg.480  | 135  | Hypothetical protein                               | 2.94  |
| fig 6666666.168244.peg.2583 | 588  | Possible transmembrane protein                     | 0.91  |
| fig 6666666.168244.peg.2673 | 2070 | Hypothetical protein                               | 0.45  |
| fig 6666666.168244.peg.1824 | 1473 | Malonate transporter                               | 1.26  |
| fig 6666666.168244.peg.1773 | 114  | Hypothetical protein                               | 2.72  |
| fig 6666666.168244.peg.2192 | 1077 | Cell surface protein                               | 1.38  |
| fig 6666666.168244.peg.427  | 2034 | DNA ligase                                         | -0.47 |
| fig 6666666.168244.peg.1281 | 267  | Hypothetical protein                               | 2.91  |
| fig 6666666.168244.peg.2523 | 195  | Hypothetical protein                               | 2.01  |
| fig 6666666.168244.peg.2723 | 126  | Hypothetical protein                               | 3.36  |
| fig 6666666.168244.peg.2173 | 825  | Inner membrane protein translocase YidC long form  | 1.50  |
| fig 6666666.168244.peg.2125 | 252  | Hypothetical protein                               | 1.58  |
| fig 6666666.168244.peg.1854 | 177  | Hypothetical protein                               | 3.56  |
| fig 6666666.168244.peg.1637 | 1704 | Hypothetical protein                               | 1.99  |
| fig 6666666.168244.peg.1675 | 378  | Hypothetical protein                               | 0.34  |
| fig 6666666.168244.peg.1497 | 2091 | Hypothetical protein                               | 1.16  |
| fig 6666666.168244.peg.1452 | 1602 | LipT                                               | 1.77  |
| fig 6666666.168244.peg.1805 | 432  | Chemotaxis protein methyltransferase CheR          | 0.28  |
| fig 6666666.168244.peg.1775 | 1215 | COG0477:permeases of major facilitator superfamily | 0.94  |
| fig 6666666.168244.peg.1486 | 213  | Hypothetical protein                               | 3.77  |
| fig 6666666.168244.peg.2763 | 153  | Hypothetical protein                               | 3.52  |
| fig 6666666.168244.peg.1609 | 2826 | Putative transcriptional regulator                 | -0.39 |
| fig 6666666.168244.peg.469  | 390  | Hypothetical protein                               | 3.28  |

|                               |      |                                                                |       |
|-------------------------------|------|----------------------------------------------------------------|-------|
| fig   6666666.168244.peg.452  | 2715 | Macrolide-specific ABC-type efflux carrier                     | -0.29 |
| fig   6666666.168244.peg.224  | 1062 | Epoxide hydrolase                                              | 1.16  |
| fig   6666666.168244.peg.1179 | 114  | Hypothetical protein                                           | 3.58  |
| fig   6666666.168244.peg.2907 | 1434 | Gamma-glutamyltranspeptidase                                   | 0.17  |
| fig   6666666.168244.peg.891  | 177  | Hypothetical protein                                           | 3.45  |
| fig   6666666.168244.peg.626  | 996  | Ribose ABC transport system permease RbsC                      | 1.15  |
| fig   6666666.168244.peg.2677 | 1005 | Similarity with known prokaryotic or eukaryotic proteins       | 0.99  |
| fig   6666666.168244.peg.570  | 159  | Hypothetical protein                                           | 1.65  |
| fig   6666666.168244.peg.1019 | 732  | Peptidase M23B                                                 | -0.13 |
| fig   6666666.168244.peg.2313 | 165  | Hypothetical protein                                           | 2.48  |
| fig   6666666.168244.peg.650  | 2046 | N-methylhydantoinase A                                         | -0.02 |
| fig   6666666.168244.peg.1699 | 606  | Transcriptional regulator TetR family                          | 0.01  |
| fig   6666666.168244.peg.2784 | 1446 | Alpha-galactosidase                                            | 1.01  |
| fig   6666666.168244.peg.6    | 1509 | Alanyl-dipeptidyl peptidase                                    | 2.11  |
| fig   6666666.168244.peg.1770 | 222  | Hypothetical protein                                           | 2.41  |
| fig   6666666.168244.peg.821  | 1329 | Membrane protein Sypl involved in exopolysaccharide production | 0.08  |
| fig   6666666.168244.peg.1622 | 2505 | Mannose-1-phosphate guanylyltransferase/phosphomannomutase     | -0.71 |
| fig   6666666.168244.peg.2948 | 819  | RNA binding methyltransferase FtsJ-like                        | -0.03 |
| fig   6666666.168244.peg.2774 | 261  | Protein ycel precursor                                         | 1.88  |
| fig   6666666.168244.peg.497  | 129  | Hypothetical protein                                           | 3.26  |
| fig   6666666.168244.peg.2304 | 117  | Hypothetical protein                                           | 3.71  |
| fig   6666666.168244.peg.625  | 918  | Ribose ABC transport system permease protein RbsC              | 0.58  |
| fig   6666666.168244.peg.810  | 186  | Hypothetical protein                                           | 3.51  |
| fig   6666666.168244.peg.557  | 756  | 3-oxoacyl-[acyl-carrier-protein] reductase                     | 0.68  |
| fig   6666666.168244.peg.1524 | 693  | Hypothetical protein                                           | 1.12  |
| fig   6666666.168244.peg.2831 | 123  | Hypothetical protein                                           | 1.76  |
| fig   6666666.168244.peg.3085 | 783  | 3-oxoacyl-[acyl-carrier-protein] reductase                     | 0.65  |
| fig   6666666.168244.peg.1388 | 381  | Arsenate reductase                                             | 0.65  |
| fig   6666666.168244.peg.3094 | 249  | Hypothetical protein                                           | 1.52  |

|                               |      |                                                                                                  |       |
|-------------------------------|------|--------------------------------------------------------------------------------------------------|-------|
| fig   6666666.168244.peg.483  | 213  | Hypothetical protein                                                                             | 1.79  |
| fig   6666666.168244.peg.947  | 1686 | Hypothetical protein                                                                             | 0.89  |
| fig   6666666.168244.peg.410  | 2961 | Adenylate cyclase/guanylate cyclase                                                              | 0.08  |
| fig   6666666.168244.peg.871  | 3066 | Hypothetical protein                                                                             | 0.48  |
| fig   6666666.168244.peg.1253 | 1830 | Hypothetical protein                                                                             | 0.77  |
| fig   6666666.168244.peg.271  | 1416 | Aspartyl-tRNA(Asn) amidotransferase subunit A<br>@ glutamyl-tRNA(Gln) amidotransferase subunit A | 0.70  |
| fig   6666666.168244.peg.1338 | 174  | Hypothetical protein                                                                             | 3.57  |
| fig   6666666.168244.peg.2290 | 864  | Carbon monoxide dehydrogenase medium chain                                                       | 0.19  |
| fig   6666666.168244.peg.1952 | 420  | Hypothetical protein                                                                             | 1.61  |
| fig   6666666.168244.peg.2414 | 126  | Hypothetical protein                                                                             | 2.40  |
| fig   6666666.168244.peg.2738 | 936  | Quinolinate synthetase                                                                           | -0.14 |
| fig   6666666.168244.peg.2022 | 1134 | Hypothetical protein                                                                             | 0.38  |
| fig   6666666.168244.peg.168  | 714  | Glycosyl transferase family 2                                                                    | 0.07  |
| fig   6666666.168244.peg.2001 | 618  | Cysteinyl-tRNA synthetase                                                                        | 4.08  |
